# Supplementary material
Source: publisher figshare collection journal article supplement (https://asha.figshare.com/articles/dataset/_/7728638)
Supplement: Supplementary file 1 [file 1]

**Supplemental Material S2.** Participant demographic information, disaggregated by language status and age.

| Language status                                     | Age                        |                             |                            |                             |                              |                             |                             |
|-----------------------------------------------------|----------------------------|-----------------------------|----------------------------|-----------------------------|------------------------------|-----------------------------|-----------------------------|
|                                                     | 3;0–3;5<br>( <i>n</i> = 1) | 3;6–3;11<br>( <i>n</i> = 4) | 4;0–4;5<br>( <i>n</i> = 5) | 4;6–4;11<br>( <i>n</i> = 3) | 5;0–5;11<br>( <i>n</i> = 13) | 6;0–6;11<br>( <i>n</i> = 5) | 7;0–7;11<br>( <i>n</i> = 5) |
| <b>Race</b>                                         |                            |                             |                            |                             |                              |                             |                             |
| Black/African American                              | 0<br>(0%)                  | 1<br>(25%)                  | 0<br>(0%)                  | 0<br>(0%)                   | 0<br>(0%)                    | 1<br>(20%)                  | 2<br>(40%)                  |
| Multiracial                                         | 0<br>(0%)                  | 2<br>(50%)                  | 0<br>(0%)                  | 0<br>(0%)                   | 0<br>(0%)                    | 1<br>(20%)                  | 0<br>(0%)                   |
| White                                               | 1<br>(100%)                | 1<br>(25%)                  | 5<br>(100%)                | 3<br>(100%)                 | 12<br>(92%)                  | 3<br>(60%)                  | 3<br>(60%)                  |
| <b>Ethnicity</b>                                    |                            |                             |                            |                             |                              |                             |                             |
| Hispanic/Latino                                     | 0<br>(0%)                  | 0<br>(0%)                   | 1<br>(20%)                 | 0<br>(0%)                   | 1<br>(8%)                    | 0<br>(0%)                   | 0<br>(0%)                   |
| <b>Maternal/primary caretaker's education level</b> |                            |                             |                            |                             |                              |                             |                             |
| Less than high school                               | 0<br>(0%)                  | 0<br>(0%)                   | 0<br>(0%)                  | 0<br>(0%)                   | 2<br>(15%)                   | 0<br>(0%)                   | 1<br>(20%)                  |
| High school diploma/equivalent                      | 1<br>(100%)                | 2<br>(50%)                  | 2<br>(40%)                 | 1<br>(33%)                  | 3<br>(23%)                   | 2<br>(40%)                  | 2<br>(40%)                  |
| Some college                                        | 0<br>(0%)                  | 2<br>(50%)                  | 2<br>(40%)                 | 0<br>(0%)                   | 4<br>(31%)                   | 2<br>(40%)                  | 1<br>(20%)                  |
| Bachelor's degree                                   | 0<br>(0%)                  | 0<br>(0%)                   | 1<br>(20%)                 | 1<br>(33%)                  | 0<br>(0%)                    | 0<br>(0%)                   | 0<br>(0%)                   |
| Graduate degree                                     | 0<br>(0%)                  | 0<br>(0%)                   | 0<br>(0%)                  | 1<br>(33%)                  | 3<br>(23%)                   | 1<br>(20%)                  | 0<br>(0%)                   |

| Language status                              | Age                         |                              |                             |                              |                              |                              |                              |
|----------------------------------------------|-----------------------------|------------------------------|-----------------------------|------------------------------|------------------------------|------------------------------|------------------------------|
|                                              | 3;0–3;5<br>( <i>n</i> = 20) | 3;6–3;11<br>( <i>n</i> = 40) | 4;0–4;5<br>( <i>n</i> = 45) | 4;6–4;11<br>( <i>n</i> = 55) | 5;0–5;11<br>( <i>n</i> = 54) | 6;0–6;11<br>( <i>n</i> = 33) | 7;0–7;11<br>( <i>n</i> = 23) |
| Language typical                             |                             |                              |                             |                              |                              |                              |                              |
| Race                                         |                             |                              |                             |                              |                              |                              |                              |
| Asian                                        | 0<br>(0%)                   | 0<br>(0%)                    | 0<br>(0%)                   | 0<br>(0%)                    | 0<br>(0%)                    | 0<br>(0%)                    | 0<br>(0%)                    |
| Black/African American                       | 0<br>(0%)                   | 1<br>(3%)                    | 0<br>(0%)                   | 0<br>(0%)                    | 3<br>(6%)                    | 4<br>(12%)                   | 0<br>(0%)                    |
| Multiracial                                  | 3<br>(15%)                  | 2<br>(5%)                    | 4<br>(9%)                   | 3<br>(5%)                    | 7<br>(13%)                   | 4<br>(12%)                   | 2<br>(9%)                    |
| White                                        | 4<br>(20%)                  | 3<br>(8%)                    | 2<br>(4%)                   | 4<br>(7%)                    | 3<br>(6%)                    | 3<br>(9%)                    | 2<br>(9%)                    |
| Ethnicity                                    |                             |                              |                             |                              |                              |                              |                              |
| Hispanic/Latino                              | 11<br>(55%)                 | 32<br>(80%)                  | 36<br>(80%)                 | 46<br>(82%)                  | 39<br>(72%)                  | 17<br>(52%)                  | 12<br>(52%)                  |
|                                              | 5<br>(25%)                  | 1<br>(3%)                    | 3<br>(7%)                   | 5<br>(9%)                    | 4<br>(7%)                    | 1<br>(2%)                    | 1<br>(4%)                    |
| Maternal/primary caretaker's education level |                             |                              |                             |                              |                              |                              |                              |
| Less than high school                        | 0<br>(0%)                   | 0<br>(0%)                    | 1<br>(2%)                   | 0<br>(0%)                    | 1<br>(2%)                    | 0<br>(0%)                    | 0<br>(0%)                    |
| High school diploma/equivalent               | 7<br>(35%)                  | 2<br>(5%)                    | 6<br>(13%)                  | 9<br>(16%)                   | 7<br>(13%)                   | 6<br>(18%)                   | 3<br>(13%)                   |
| Some college                                 | 2<br>(10%)                  | 11<br>(28%)                  | 10<br>(22%)                 | 10<br>(18%)                  | 11<br>(20%)                  | 11<br>(33%)                  | 4<br>(17%)                   |
| Bachelor's degree                            | 4<br>(20%)                  | 9<br>(23%)                   | 17<br>(37%)                 | 15<br>(27%)                  | 16<br>(30%)                  | 11<br>(33%)                  | 11<br>(48%)                  |
| Graduate degree                              | 3<br>(15%)                  | 15<br>(38%)                  | 11<br>(24%)                 | 18<br>(33%)                  | 18<br>(33%)                  | 3<br>(9%)                    | 2<br>(9%)                    |
