# Supplementary material
Source: publisher figshare collection journal article supplement (https://asha.figshare.com/articles/dataset/_/7728638)
Supplement: Supplementary file 2 [file 1]

**Supplemental Material S1.** Age, gender, and performance on language test for each participant in language impairment group.

| <b>Participant</b> | <b>Age (mos)</b> | <b>Gender</b> | <b>TEEM<br/>T Score</b> |
|--------------------|------------------|---------------|-------------------------|
| LI <sub>1</sub>    | 40               | F             | 22                      |
| LI <sub>2</sub>    | 45               | M             | 13                      |
| LI <sub>3</sub>    | 45               | F             | 16                      |
| LI <sub>4</sub>    | 46               | M             | 23                      |
| LI <sub>5</sub>    | 46               | M             | 25                      |
| LI <sub>6</sub>    | 48               | M             | 22                      |
| LI <sub>7</sub>    | 49               | F             | 26                      |
| LI <sub>8</sub>    | 49               | M             | 17                      |
| LI <sub>9</sub>    | 51               | M             | 9                       |
| LI <sub>10</sub>   | 51               | M             | 7                       |
| LI <sub>11</sub>   | 57               | M             | 25                      |
| LI <sub>12</sub>   | 57               | F             | 20                      |
| LI <sub>13</sub>   | 58               | M             | 18                      |
| LI <sub>14</sub>   | 60               | M             | 24                      |
| LI <sub>15</sub>   | 61               | M             | 22                      |
| LI <sub>16</sub>   | 61               | M             | 3                       |
| LI <sub>17</sub>   | 62               | M             | -4                      |
| LI <sub>18</sub>   | 63               | F             | 9                       |
| LI <sub>19</sub>   | 65               | F             | 18                      |
| LI <sub>20</sub>   | 66               | M             | 13                      |
| LI <sub>21</sub>   | 66               | M             | 7                       |
| LI <sub>22</sub>   | 67               | F             | 18                      |
| LI <sub>23</sub>   | 70               | M             | -15                     |
| LI <sub>24</sub>   | 70               | M             | -8                      |
| LI <sub>25</sub>   | 70               | F             | -6                      |
| LI <sub>26</sub>   | 71               | M             | 3                       |
| LI <sub>27</sub>   | 75               | M             | 14                      |
| LI <sub>28</sub>   | 75               | F             | 16                      |
| LI <sub>29</sub>   | 76               | F             | 16                      |
| LI <sub>30</sub>   | 77               | M             | -13                     |
| LI <sub>31</sub>   | 80               | M             | -8                      |
| LI <sub>32</sub>   | 84               | M             | 3                       |
| LI <sub>33</sub>   | 85               | M             | -48                     |
| LI <sub>34</sub>   | 86               | M             | -15                     |
| LI <sub>35</sub>   | 87               | M             | 27                      |
| LI <sub>36</sub>   | 91               | M             | 12                      |

---

*Note.* TEEM = Test for Examining Expressive Morphology (Shipley et al., 1983).

**Reference**

Shipley, K. G., Stone, T. A., & Sue, M. B. (1983). *Test for Examining Expressive Morphology (TEEM)*. Tucson, AZ: Communication Skill Builders
